# Supplementary material
Source: PubMed Central journal article supplement (PMC2040886)

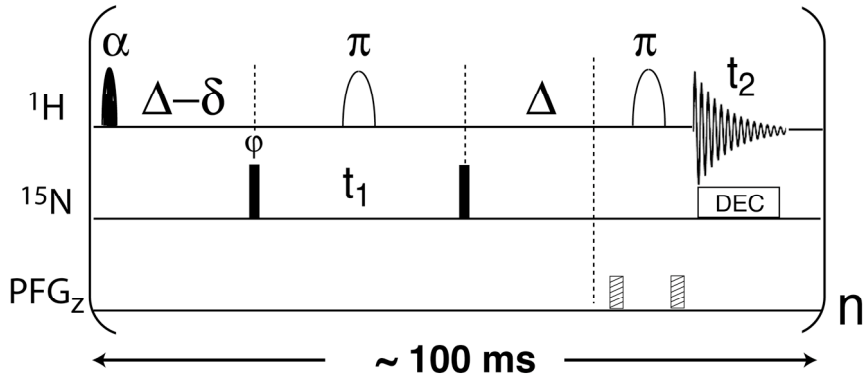

Supplement: pnas_0702069104_1.pdf [file pnas_0702069104_1.pdf]

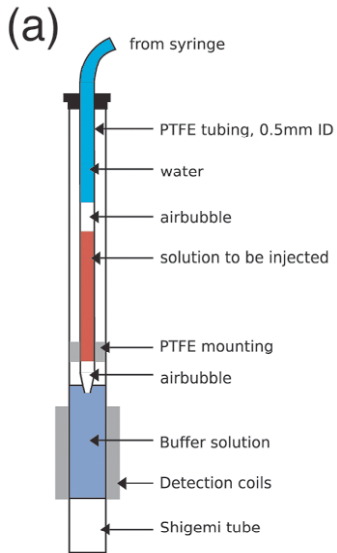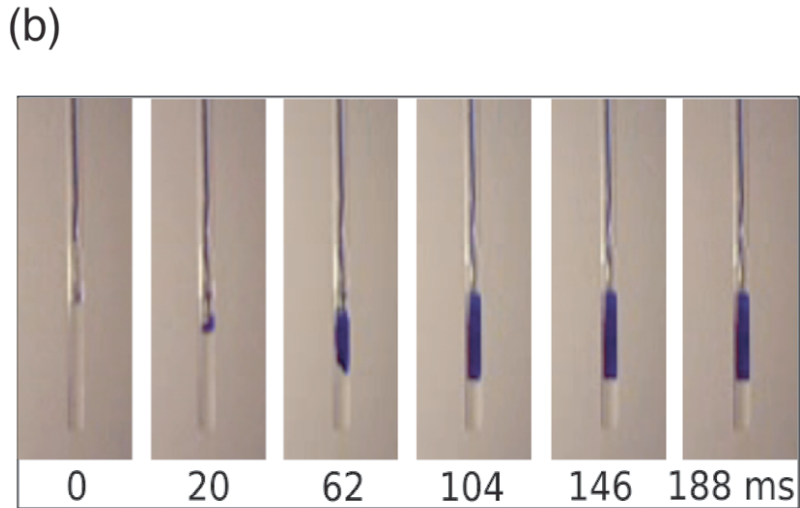

Supplement: pnas_0702069104_2.pdf [file pnas_0702069104_2.pdf]

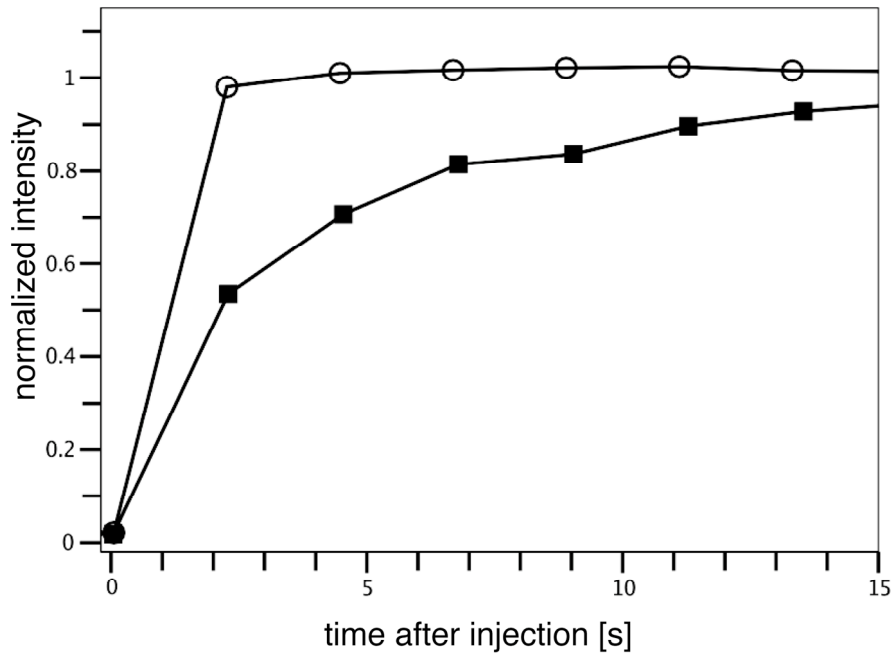

Supplement: pnas_0702069104_3.pdf [file pnas_0702069104_3.pdf]

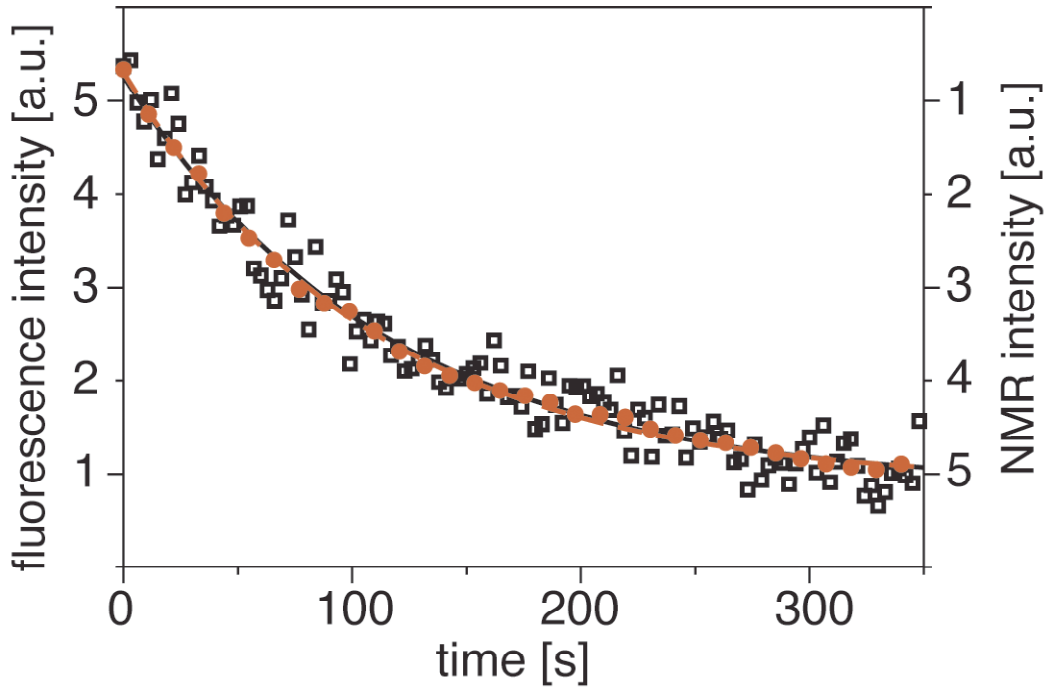

Supplement: pnas_0702069104_4.pdf [file pnas_0702069104_4.pdf]

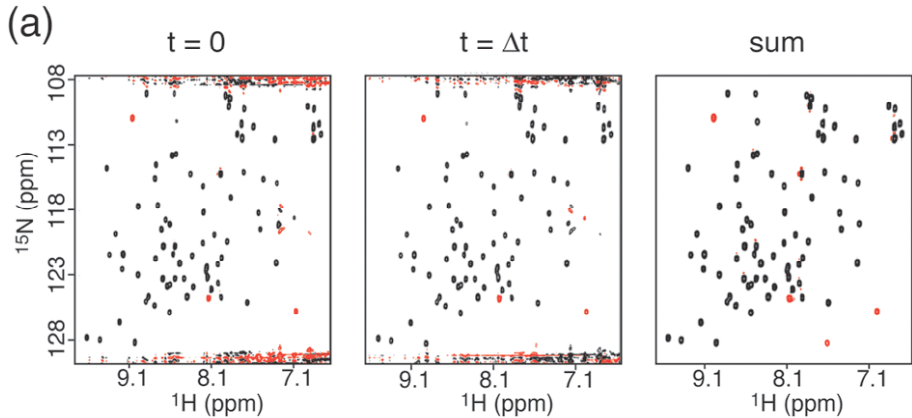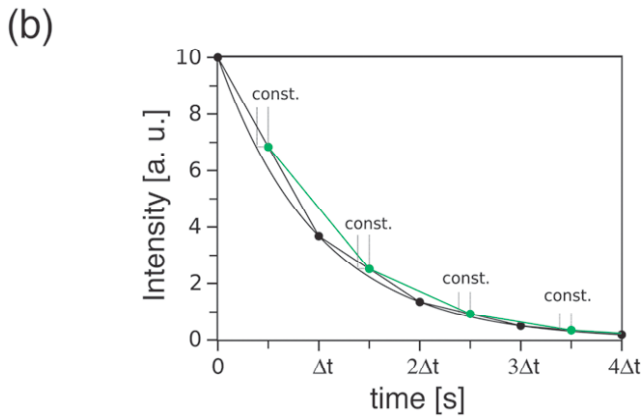

Supplement: pnas_0702069104_5.pdf [file pnas_0702069104_5.pdf]

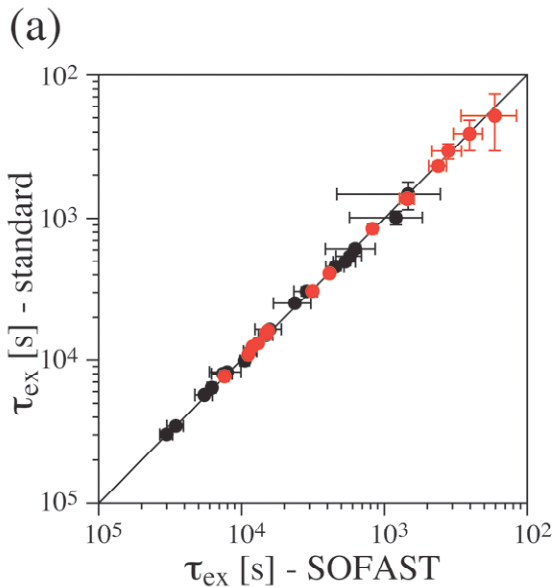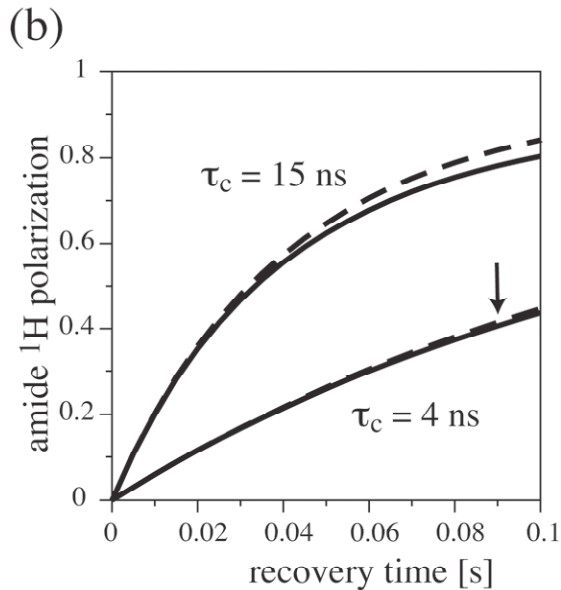

Supplement: pnas_0702069104_6.pdf [file pnas_0702069104_6.pdf]
